# Supplementary material for: Yeast homologs of human MCUR1 regulate mitochondrial proline metabolism
Source: PubMed Central journal article supplement (PMC7519068; doi:10.1038/s41467-020-18704-1), 2020-09-25
Supplement: 41467_2020_18704_MOESM1_ESM.pdf [file 41467_2020_18704_MOESM1_ESM.pdf]

Supplementary Information

**Yeast homologs of human MCUR1 regulate mitochondrial proline  
metabolism**

Zulkifli et al.

**a**

| DELTA-BLAST hits of Human MCUR1 (UniProt ID:Q96AQ8-1) in <i>S. cerevisiae</i> Refseq_protein database |                |         |          |             |
|-------------------------------------------------------------------------------------------------------|----------------|---------|----------|-------------|
| Protein                                                                                               | Query Coverage | E value | Identity | Accession   |
| Fmp32 (Put6)                                                                                          | 54%            | 2e-40   | 25.00%   | NP_116608.1 |
| Ylr283w (Put7)                                                                                        | 55%            | 2e-08   | 18.57%   | NP_013385.1 |

**b**

| DELTA-BLAST hits of <i>S. cerevisiae</i> Fmp32 (UniProt ID:P43557) in Human Refseq_protein database |     |       |        |                |
|-----------------------------------------------------------------------------------------------------|-----|-------|--------|----------------|
| MCUR1                                                                                               | 84% | 5e-57 | 24.48% | NP_001026883.1 |
| CCDC90B                                                                                             | 84% | 7e-57 | 21.88% | NP_068597.2    |

  

| DELTA-BLAST hits of <i>S. cerevisiae</i> Ylr283w (UniProt ID:Q05867) in Human Refseq_protein database |     |       |        |                |
|-------------------------------------------------------------------------------------------------------|-----|-------|--------|----------------|
| MCUR1                                                                                                 | 60% | 4e-48 | 19.32% | NP_001026883.1 |
| CCDC90B                                                                                               | 52% | 4e-40 | 16.30% | NP_068597.2    |

**c**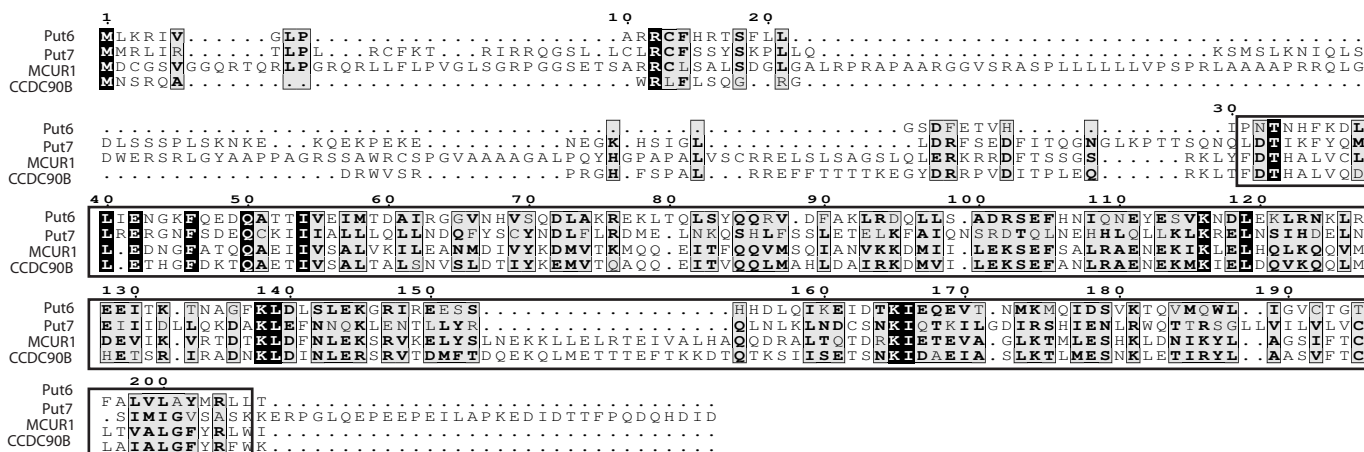

**Supplementary Fig.1: Sequence analysis of MCUR1, Put6 and Put7.** (a) DELTA-BLAST analysis of human MCUR1 as query with *S. cerevisiae* reference protein database. (b) DELTA-BLAST analysis of *S. cerevisiae* Fmp32 (Put6) and Ylr283w (Put7) protein as query with *H. sapiens* reference protein database. Top hits from the analysis are presented with % query coverage, E values, % identity and accession number. (c) Multiple sequence alignment of *S. cerevisiae* Put6, Put7, MCUR1 and its paralog CCDC90B showing sequence conservation in the predicted DUF1640 region (highlighted by box).

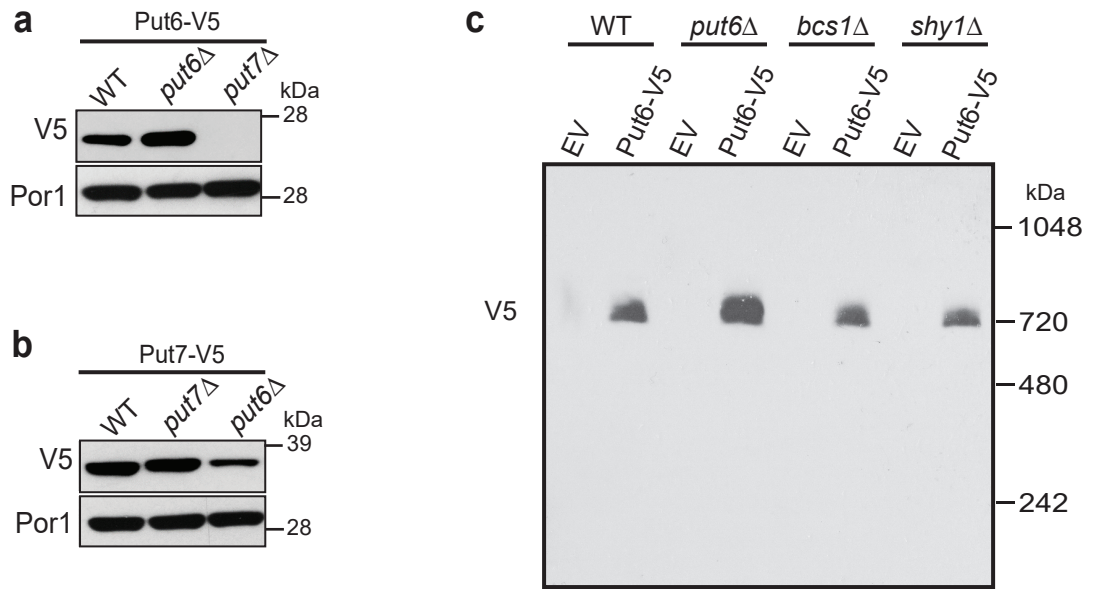

**Supplementary Fig. 2: Put6 and Put7 protein levels depend on each other but not on mitochondrial respiratory chain complexes. (a and b)** SDS-PAGE immunoblot analysis of mitochondrial proteins from the indicated strains expressing Put6-V5 or Put7-V5. Por1 was used as loading control. Data is representative of three biologically independent experiments. **(c)** Mitochondria from WT, *put6*Δ, *bcs1*Δ, and *shy1*Δ cells transformed with empty vector or Put6-V5 were solubilized in digitonin and analyzed by BN-PAGE immunoblotting using anti-V5 antibody. Data is representative of two biologically independent experiments. The source data are provided as Source Data file.

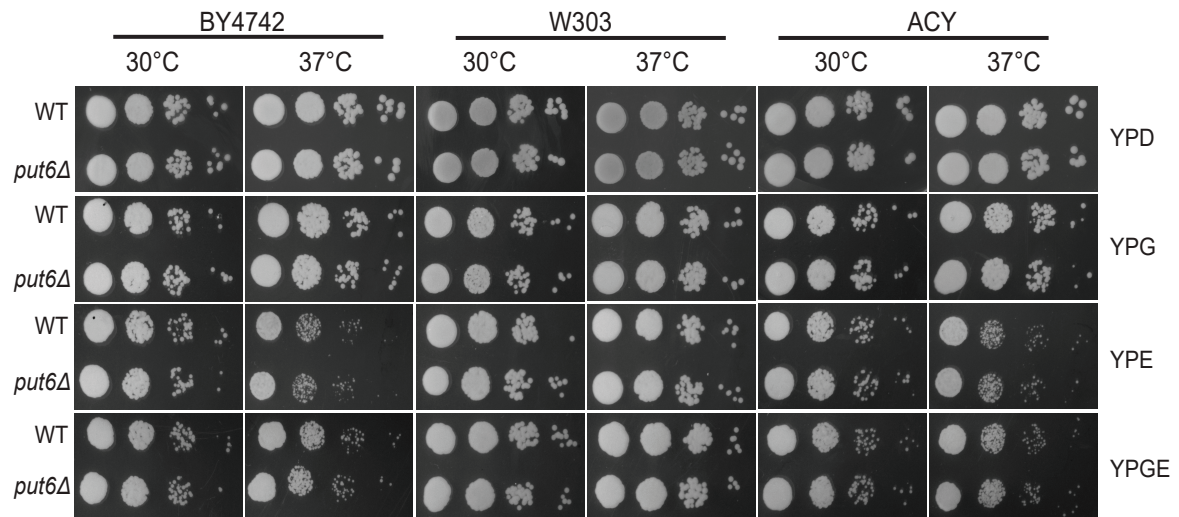

**Supplementary Fig. 3: Put6 is not required for respiratory growth.** Ten-fold serially diluted WT and *put6Δ* yeast cells from three different genetic backgrounds (BY4742, W303 and prototrophic yeast ACY) were seeded on YPD, YPG, YPE and YPGE plates at 30°C and 37°C. Pictures were taken after 2 days of growth in YPD or 5 days of growth in YPG, YPE, and YPGE media. Data is representative of three independent experiments.



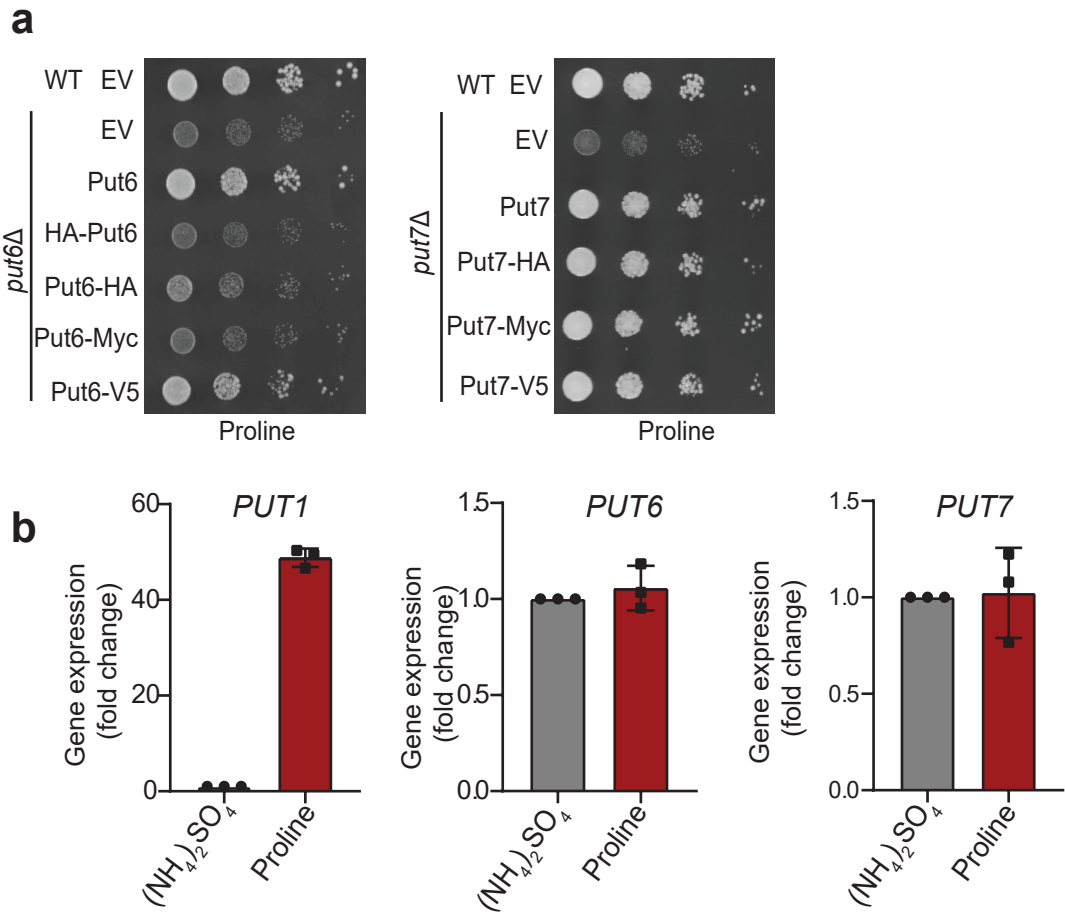

**Supplementary Fig. 4: (a)** Ten-fold serial dilutions of indicated yeast strains harboring empty vector (EV) or tagged versions of Put6/Put7 were seeded on synthetic media plates containing proline as the sole nitrogen source and incubated at 30°C. Pictures were taken after 3 days of seeding. All the above data is representative of at least three biologically independent experiments. **(b)** WT yeast cells were grown in synthetic galactose-containing media with ammonium sulfate or proline as the sole nitrogen source and *PUT1*, *PUT6* and *PUT7* transcript levels were measured by qRT-PCR. *ACT1* was used as an internal control and *PUT1*, which is known to be up regulated in proline-containing media, was used as a positive control. Data are normalized to transcript levels from cells cultured in ammonium sulfate and are expressed as mean ± SD (n=3 biologically independent experiments). The source data are provided as Source Data file.

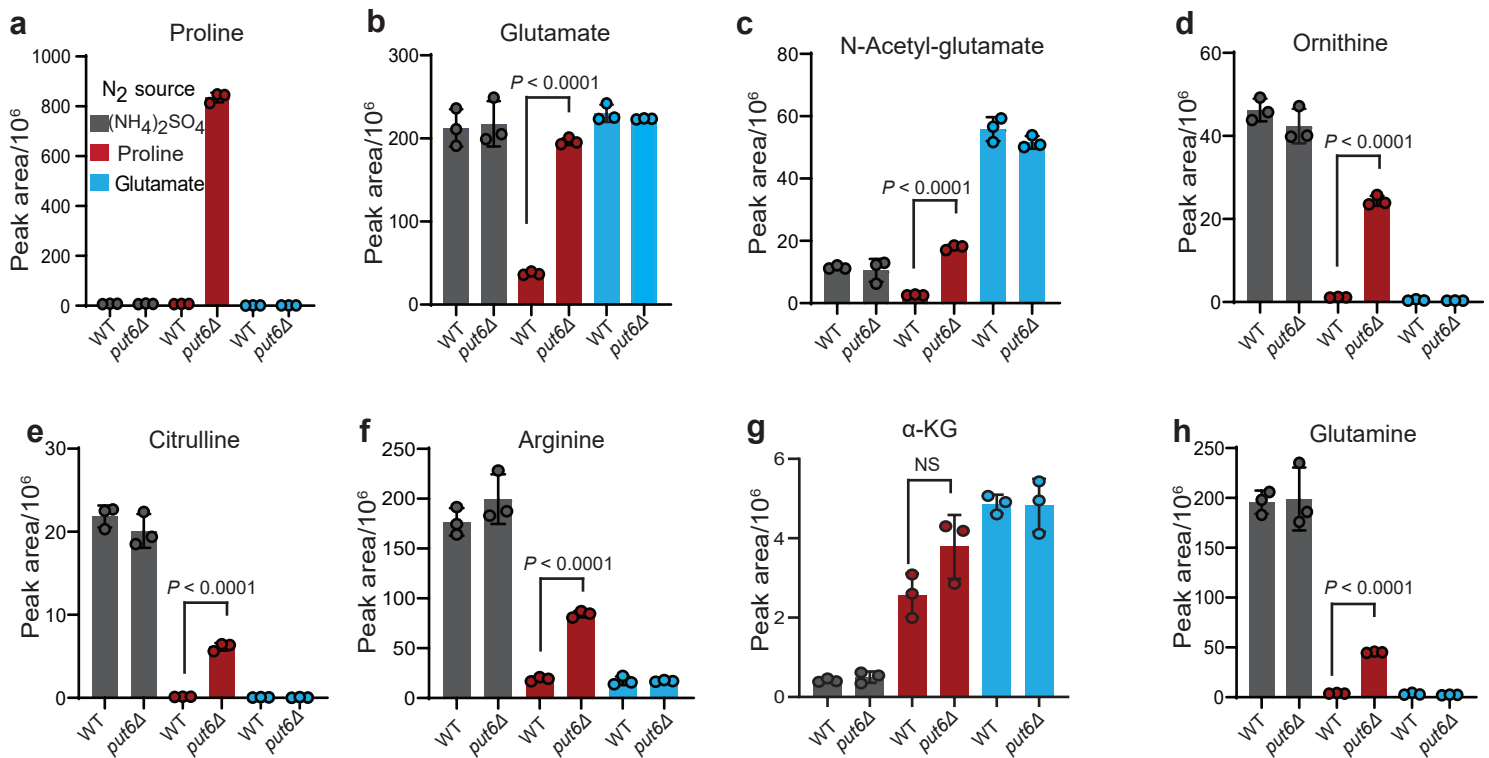

**Supplementary Fig. 5:** LC-MS-based quantification of (a) proline, (b) glutamate, (c) N-acetyl glutamate, (d) ornithine, (e) citrulline, (f) arginine, (g)  $\alpha$ -ketoglutarate, and (h) glutamine in WT and *put6Δ* yeast cells cultured in ammonium sulfate (grey bars), proline (red bars) or glutamate (blue bars) as the sole nitrogen source. (Data are potted as mean  $\pm$  SD,  $n=3$  biologically independent experiments). Statistical significance was assessed by one-way analysis of variance (ANOVA) with Tukey's multiple comparison test; NS- not significant. The source data are provided as Source Data file.

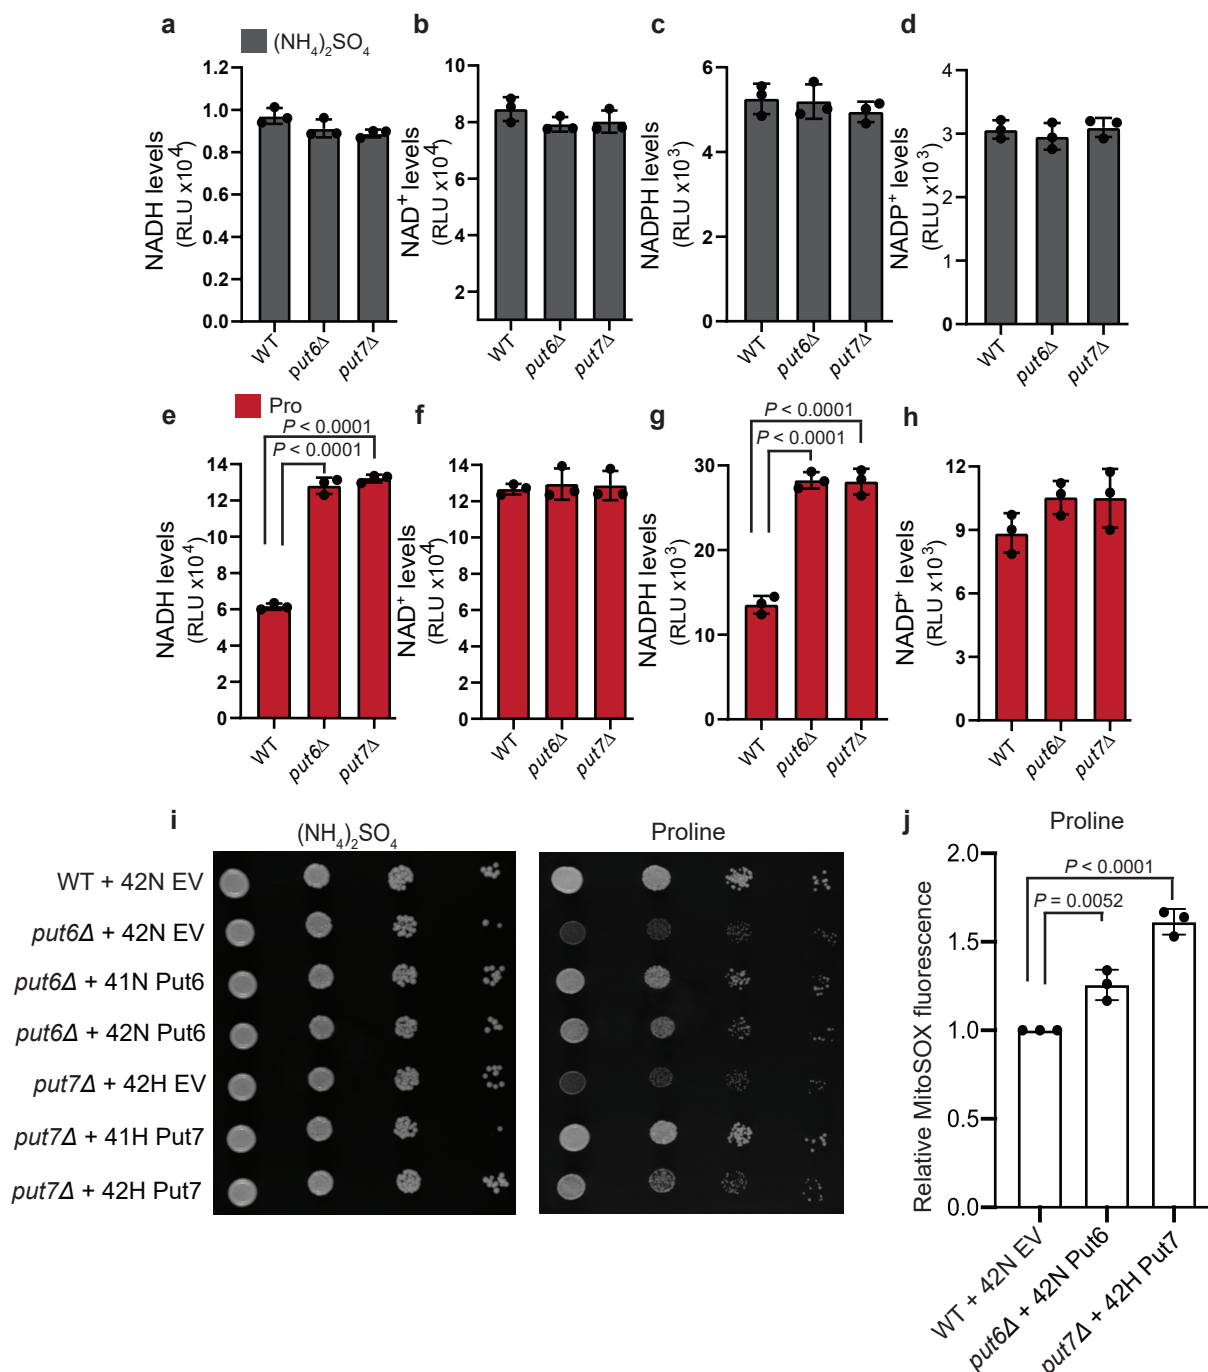

**Supplementary Fig. 6: Loss or overexpression of Put6 and Put7 perturbs redox balance.** (a-h) Levels of NADH, NAD<sup>+</sup>, NADPH and NADP<sup>+</sup> in WT, *put6* $\Delta$  and *put7* $\Delta$  yeast cells grown on synthetic galactose media with ammonium sulfate (a-d) or proline (e-h) as the sole nitrogen source were measured using NAD/NADH-Glo™ and NADP/NADPH-Glo™ assays (Promega). Data were normalized to blank control and are expressed as mean  $\pm$  SD (n=3 biologically independent experiments). (i) Ten-fold serial dilutions of indicated yeast strains harboring empty vector (EV) or Put6 and Put7 cloned in 41N, 41H (single copy) or 42N, 42H (multi-copy) vectors, were seeded on synthetic media plates containing proline as the sole nitrogen source and incubated at 30°C. Pictures were taken after 3 days of seeding. (j) Mitochondrial ROS measured using MitoSOX fluorescence in yeast cells grown in proline as the sole nitrogen source. Data were normalized to unstained control and are expressed as mean  $\pm$  SD (n=3 biologically independent experiments) relative to WT. Statistical significance was assessed by one-way ANOVA with Tukey's multiple comparison test. The source data are provided as Source Data file.

**Supplementary Table 1:** *Saccharomyces cerevisiae* strains used in this study.

| <i>Saccharomyces cerevisiae</i> strains                                                                                                                        | Source                  |
|----------------------------------------------------------------------------------------------------------------------------------------------------------------|-------------------------|
| BY4741 WT - <i>MATa</i> , <i>his3Δ1</i> , <i>leu2Δ0</i> , <i>met15Δ0</i> , <i>ura3Δ0</i>                                                                       | Dr. Miriam L. Greenberg |
| BY4741 <i>put6Δ</i> - <i>MATa</i> , <i>his3Δ1</i> , <i>leu2Δ0</i> , <i>met15Δ0</i> , <i>ura3Δ0</i> , <i>put6Δ::hphNT1</i>                                      | This Study              |
| BY4741 <i>put7Δ</i> - <i>MATa</i> , <i>his3Δ1</i> , <i>leu2Δ0</i> , <i>met15Δ0</i> , <i>ura3Δ0</i> , <i>put7Δ::natMX4</i>                                      | This Study              |
| BY4741 <i>put6Δ put7Δ</i> - <i>MATa</i> , <i>his3Δ1</i> , <i>leu2Δ0</i> , <i>met15Δ0</i> , <i>ura3Δ0</i> , <i>put6::hphNT1 put7Δ::natMX4</i>                   | This Study              |
| BY4742 WT - <i>MATα</i> , <i>his3Δ1</i> , <i>leu2Δ0</i> , <i>lys2Δ0</i> , <i>ura3Δ0</i>                                                                        | Dr. Miriam L. Greenberg |
| BY4742 <i>put6Δ</i> - <i>MATα</i> , <i>his3Δ1</i> , <i>leu2Δ0</i> , <i>lys2Δ0</i> , <i>ura3Δ0</i> , <i>put6Δ::hphNT1</i>                                       | This Study              |
| W303 WT- <i>MATa</i> , <i>leu2-3,112</i> <i>trp1-1</i> , <i>can1-100</i> , <i>ura3-1</i> , <i>ade2-1</i> , <i>his3-11,15</i>                                   | Dr. Miriam L. Greenberg |
| W303 <i>put6Δ</i> - <i>MATa</i> , <i>leu2-3,112</i> <i>trp1-1</i> , <i>can1-100</i> , <i>ura3-1</i> , <i>ade2-1</i> , <i>his3-11,15</i> , <i>put6Δ::hphNT1</i> | This Study              |
| ACY WT- <i>MATa</i> , <i>hoΔ::KanMX</i>                                                                                                                        | Dr. Amy A. Caudy        |
| ACY <i>put6Δ</i> - <i>MATa</i> , <i>hoΔ::KanMX</i> , <i>put6Δ::hphNT1</i>                                                                                      | This Study              |
| ACY <i>put7Δ</i> - <i>MATa</i> , <i>hoΔ::KanMX</i> , <i>put7Δ::natMX4</i>                                                                                      | This Study              |
| ACY <i>put6Δ put7Δ</i> – <i>MATa</i> , <i>hoΔ::KanMX</i> , <i>put6Δ::hphNT1 put7Δ::natMX4</i>                                                                  | This Study              |
| ACY <i>put1Δ</i> - <i>MATa</i> , <i>hoΔ::KanMX</i> , <i>put1Δ::hphNT1</i>                                                                                      | This Study              |
| CEN.PK <i>MATa</i>                                                                                                                                             | Dr. Benjamin Tu         |
| CEN.PK <i>MATa</i> , <i>put6Δ::G418</i>                                                                                                                        | This Study              |
| CEN.PK <i>MATa</i> , <i>put7Δ::natMX4</i>                                                                                                                      | This Study              |
| CEN.PK <i>MATa</i> , <i>put6Δ::G418 put7Δ::natMX4</i>                                                                                                          | This Study              |

**Supplementary Table 2:** Plasmids used in this study.

| Plasmids                                                                   | Source           |
|----------------------------------------------------------------------------|------------------|
| pRS416                                                                     | Dr. Craig Kaplan |
| pRS41H                                                                     | Dr. Craig Kaplan |
| pRS41N                                                                     | Dr. Craig Kaplan |
| pRS42H                                                                     | Dr. Craig Kaplan |
| pRS42N                                                                     | Dr. Craig Kaplan |
| pRS416 Put6                                                                | This Study       |
| pRS416 Put6-V5                                                             | This Study       |
| pRS416 Put7                                                                | This Study       |
| pRS416 Put7-V5                                                             | This Study       |
| pRS416 Put7-HA                                                             | This Study       |
| pRS41N Put6                                                                | This Study       |
| pRS41N Put6-V5                                                             | This Study       |
| pRS42N Put6-V5                                                             | This Study       |
| pRS41H Put7                                                                | This Study       |
| pRS41H Put7-V5                                                             | This Study       |
| pRS42H Put7-V5                                                             | This Study       |
| pRS41N Codon optimized MCUR1-V5 (contains endogenous <i>PUT6</i> promoter) | This Study       |
| pRS41H Codon optimized MCUR1-V5 (contains endogenous <i>PUT6</i> promoter) | This Study       |

**Supplementary Table 3:** Antibodies used in this study.

| Antibodies                  | Source              | Identifier    |
|-----------------------------|---------------------|---------------|
| Mouse monoclonal anti-V5    | ThermoFisher        | Cat# 46-0705  |
| Rabbit polyclonal anti-V5   | ThermoFisher        | Cat# PA1-993  |
| Mouse monoclonal anti-Pgk1  | ThermoFisher        | Cat# 459250   |
| Mouse monoclonal anti-HA    | Sigma-Aldrich       | Cat# H9658    |
| Rabbit monoclonal anti-HA   | Abcam               | Cat# ab182009 |
| Mouse monoclonal anti-Cox1  | Abcam               | Cat# ab110270 |
| Mouse monoclonal anti-Cox2  | Abcam               | Cat# ab110271 |
| Mouse monoclonal anti-Cox4  | Abcam               | Cat# ab110272 |
| Mouse monoclonal anti-Por1  | Abcam               | Cat# ab110326 |
| Rabbit polyclonal anti-Coa6 | Dr. Vishal M. Gohil | N/A           |
| Rabbit anti-Sdh2            | Dr. Dennis Winge    | N/A           |
| Mouse anti-Rip1             | Dr. Vincenzo Zara   | N/A           |
| Rabbit anti-Tom70           | Dr. Jan Brix        | N/A           |
| Rabbit anti-Tim50           | Dr. Jan Brix        | N/A           |
| Rabbit anti-Tom44           | Dr. Jan Brix        | N/A           |

**Supplementary Table 4:** Primers used in this study

| Primer Name                 | Sequence 5'→ 3'                                                  |
|-----------------------------|------------------------------------------------------------------|
| FMP32 Del For               | GTGAGCGTAATAAGTAAAGTAAGGTAGAACGGAATAAAATGCAGATTGTACT<br>GAGAGTGC |
| FMP32 Del Rev               | CAAGTACCAAGTCTAGCCCTTTTTCCTCGCTTGTCGCCACTACCTTACGCAT<br>CTGTGCGG |
| YLR283W Del For             | TTTATGTATACATGTAAACTCTGAACATCTAATAGACTAATGCGTACGCTGCA<br>GGTCGAC |
| YLR283W Del Rev             | ACACACAATATACTTATGTACAGACAATATGTATGCTAATTATCGATGAATTC<br>GAGCTCG |
| Put1 Del For                | AACATCGCTACATAGTAATAACACTAACGCACGCTAGAAATGCGTACGCTGC<br>AGGTCGAC |
| Put1 Del Rev                | TGGTTTGTCTTTGAAATTGGAGTATATATTATAGTCCTCTCATCGATGAATTC<br>GAGCTCG |
| Fmp32-V5 For                | CCCCTGGAGCTCAACCACACATAGCGACACTAGACGC                            |
| Fmp32-V5 Rev                | GGGGCCTCTAGATTACGTAGAATCGAGACCGAGGAGA                            |
| YLR283W For                 | CCCCGCGAGCTCGCGCGGAGCTTAAGCCGGGCAAGC                             |
| YLR283W Rev                 | CCCTGCCTCGAGATCTATATCATGTTGATCTTGAGGGA                           |
| YLR283W(nostop)<br>BamH1Rev | CCCTGCGGATCCATCTATATCATGTTGATCTTGAGGGA                           |
| pRS416 3HA Ecor1<br>Rev     | CCCAAAGAATTCTGCAAGCCGCACCTGCATGCTTAAGC                           |
| YLR283W BamH1<br>(stop) Rev | CCCTGCGGATCCTTAATCTATATCATGTTGATCTTGAGGGA                        |
| MCUR1-V5 For                | ATGCATGAGCTCAACCACACATAGCGACACTAGACGC                            |
| MCUR1-V5 Rev                | CCCCGGTCTAGACTAGGTAGAGTCCAAACCTAAC                               |
